# Supplementary material
Source: publisher figshare collection journal article supplement (https://acs.figshare.com/ndownloader/files/4138030)
Supplement: Supplementary file 1 [file 4138030]

## SUPPORTING INFORMATION

### Bioactivation of Fluorinated 2-Aryl-benzothiazole Anti-tumor Molecules by Human Cytochrome P450s 1A1 and 2W1 and Deactivation by Cytochrome P450 2S1

Wang, K., and Guengerich, F. P. (2012) *Chem. Res. Toxicol.* 25, 000-000

**Figure S1.** Selective NOE NMR spectra of GW 610

**Figure S2.** <sup>1</sup>H NMR spectrum of **4c'**

**Figure S3.** <sup>1</sup>H NMR and HH COSY spectra of **8a**

**Figure S4.** <sup>1</sup>H NMR spectrum of **8b**

**Figure S5.** UV spectra of GW610, **4b**, **4c**, and **4c'**

**Figure S6.** HPLC chromatograms of incubations of GW 610 with P450 2W1 using **4b** as internal standard

**Figure S7.** HPLC chromatograms of incubations of 5F 203 with P450s 2W1 and 1A1

**Figure S8.** HPLC chromatograms and UV spectra of synthetic **10**, **11**, and **9**

**Figure S9.** LC-MS chromatograms and spectra of **4c** and **4c'**

**Figure S10.** LC-MS chromatograms of 5F 203 oxidation products formed by P450s 2W1 and 1A1

**Figure S11.** LC-MS/MS and LC-MS<sup>3</sup> chromatograms and CID spectra showing the presence of a dGuo adduct derived from synthetic **10**.

**Figure S1.** Selective NOE NMR spectra of GW 610

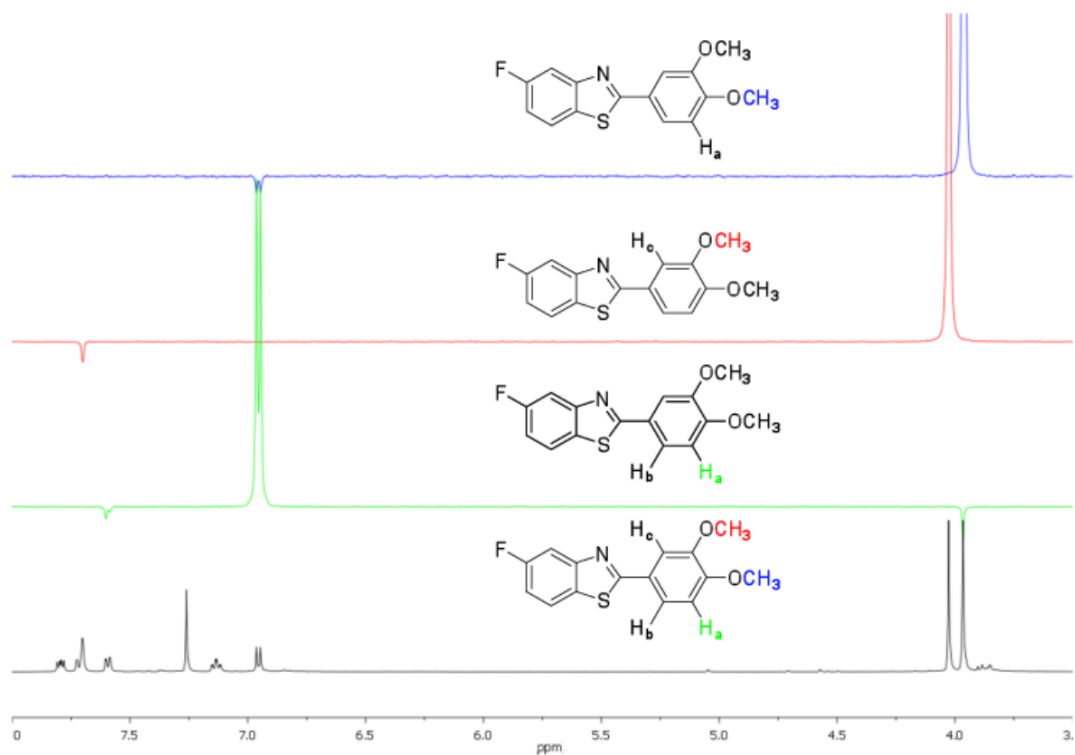

**Figure S2.**  $^1\text{H}$  NMR spectrum of **4c'**

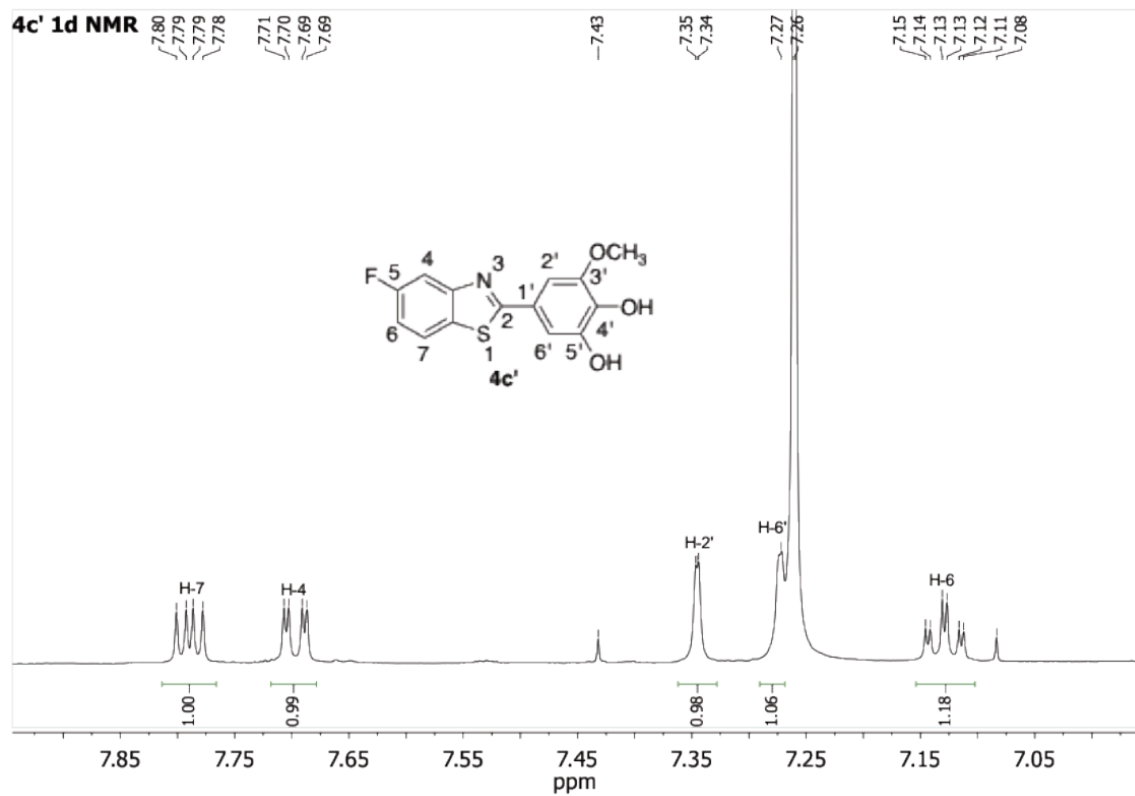

**Figure S3.**  $^1\text{H}$  NMR and HH COSY spectra of **8a**

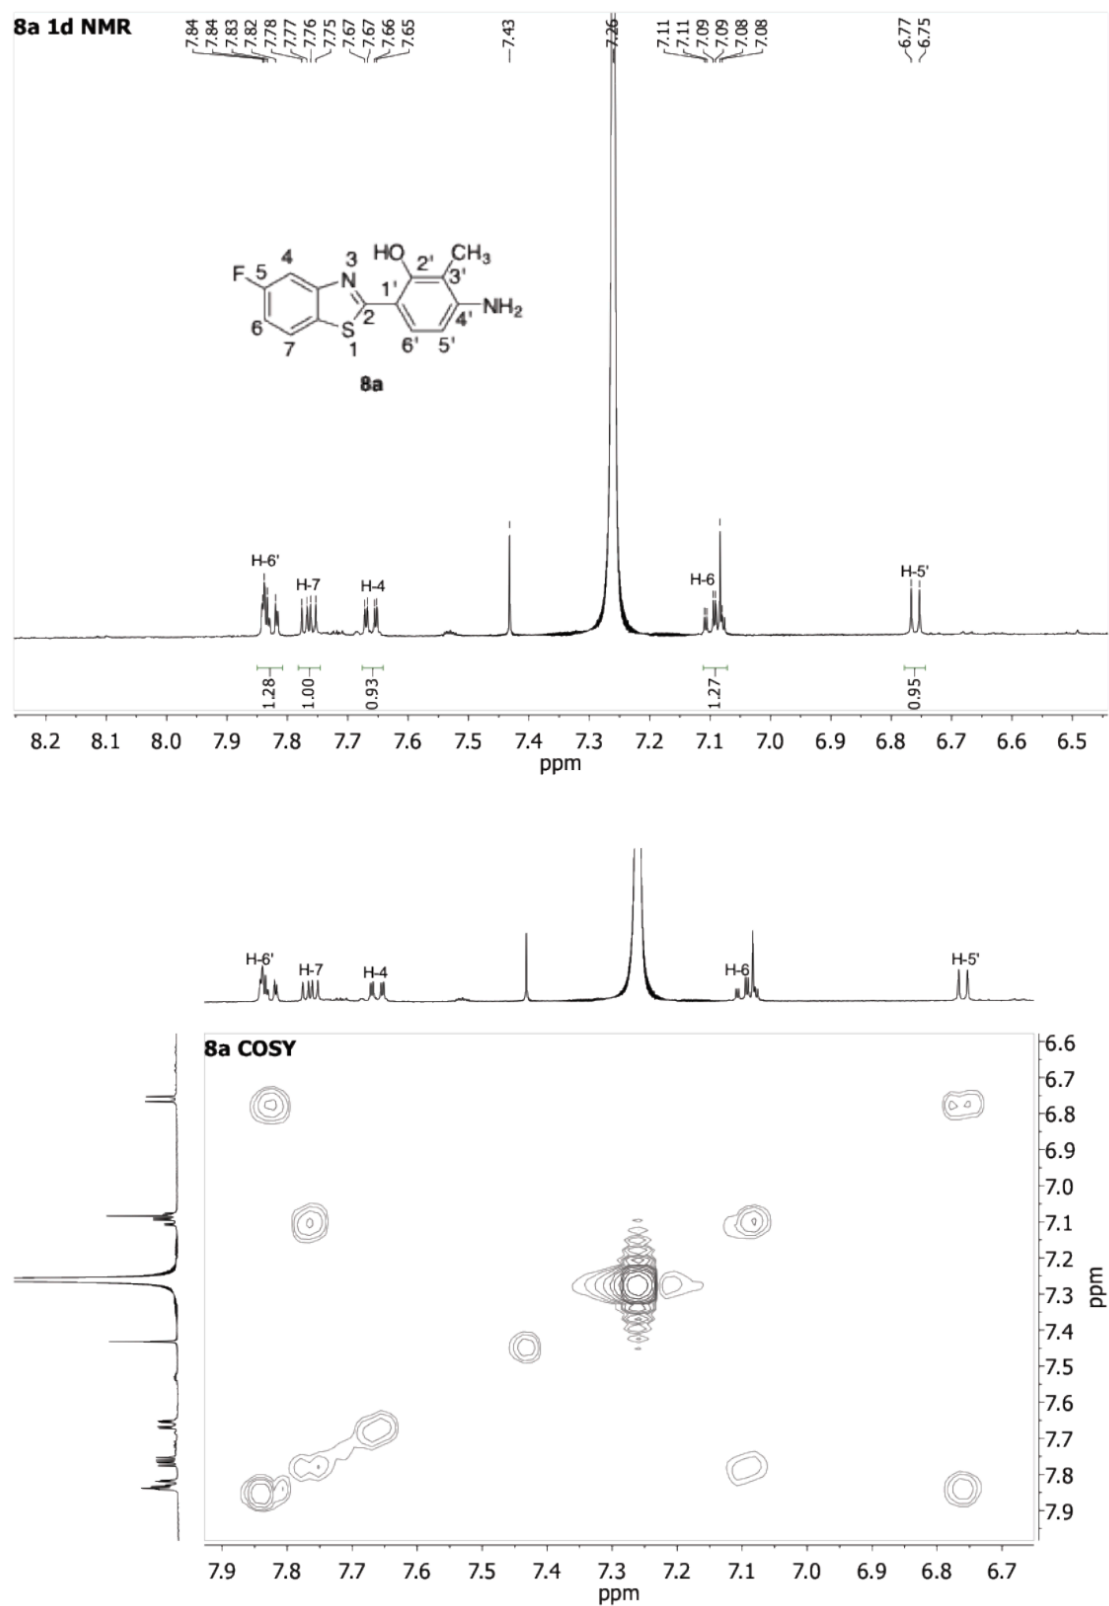

**Figure S4.**  $^1\text{H}$  NMR spectrum of **8b**

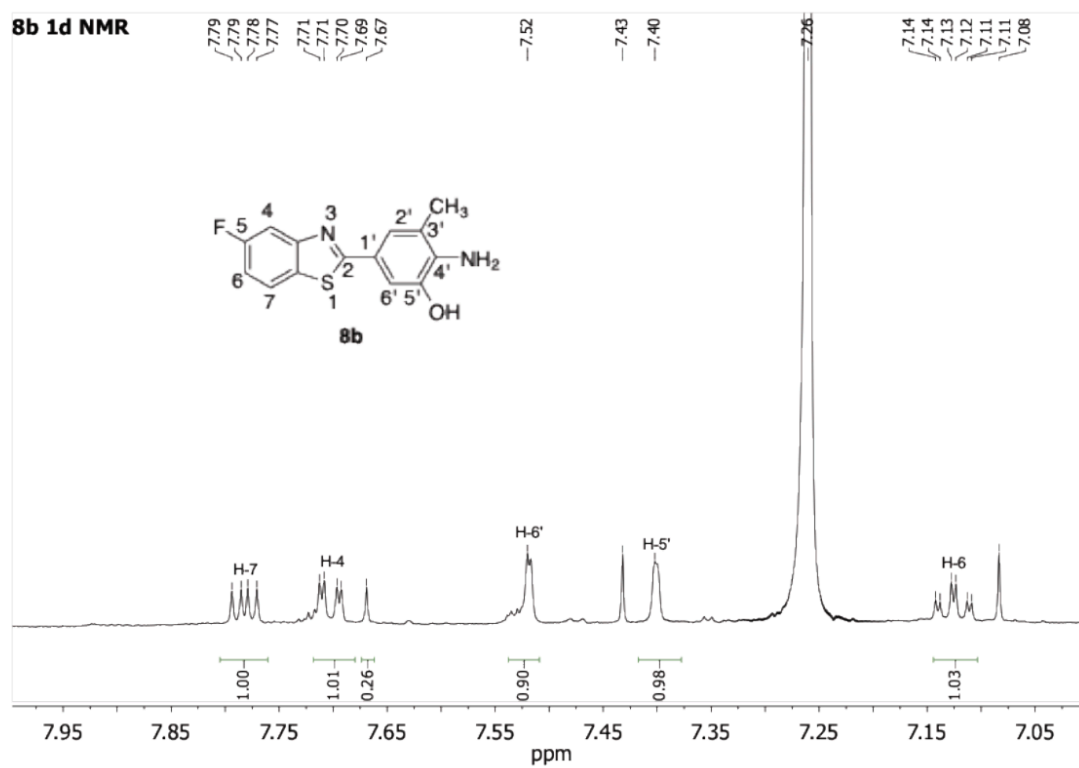

**Figure S5.** UV spectra of GW610, **4b**, **4c**, and **4c'**

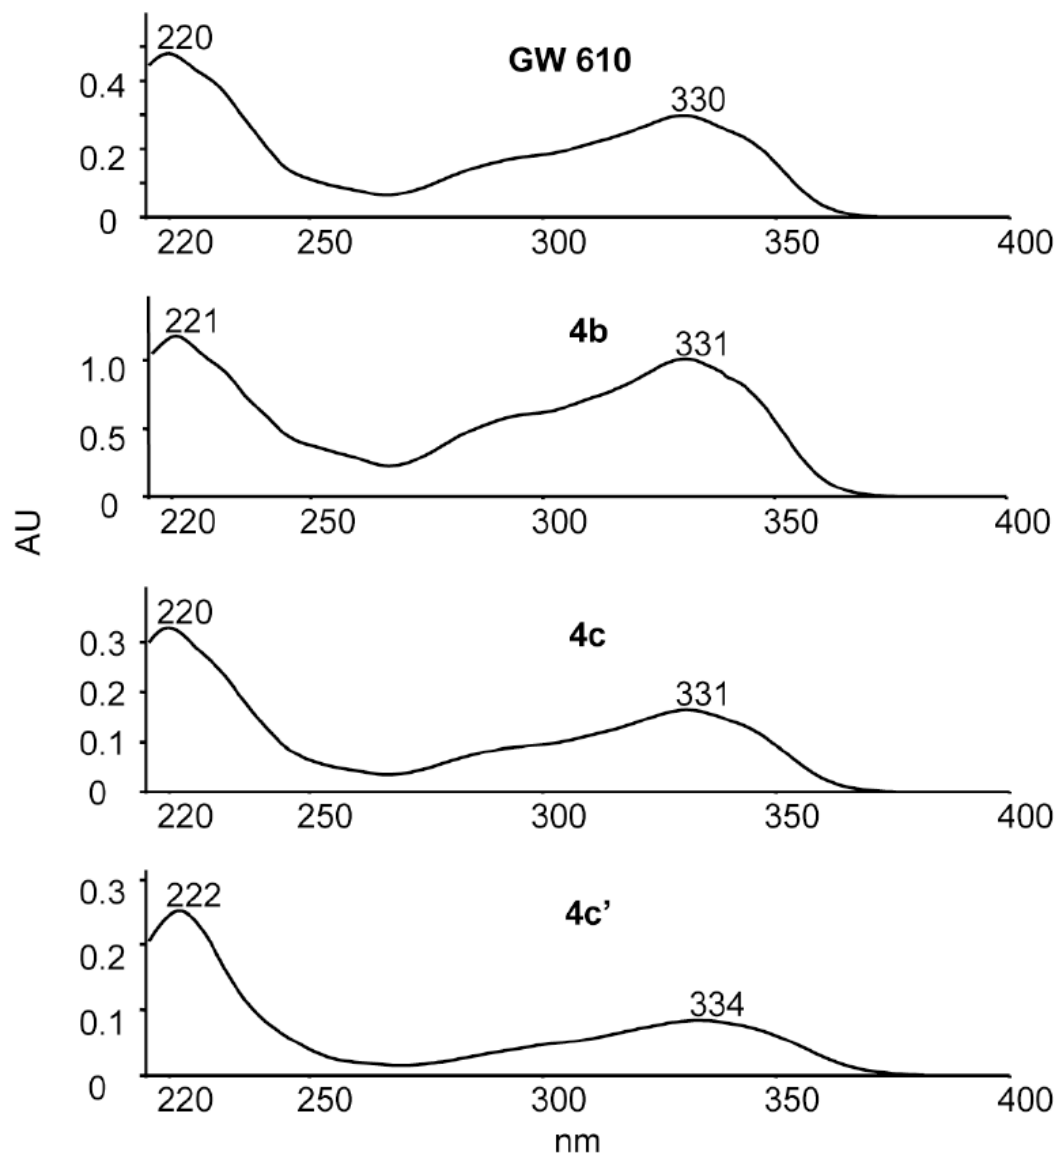

**Figure S6.** HPLC chromatograms\* of incubations of GW 610 with P450 2W1 using **4b** as internal standard

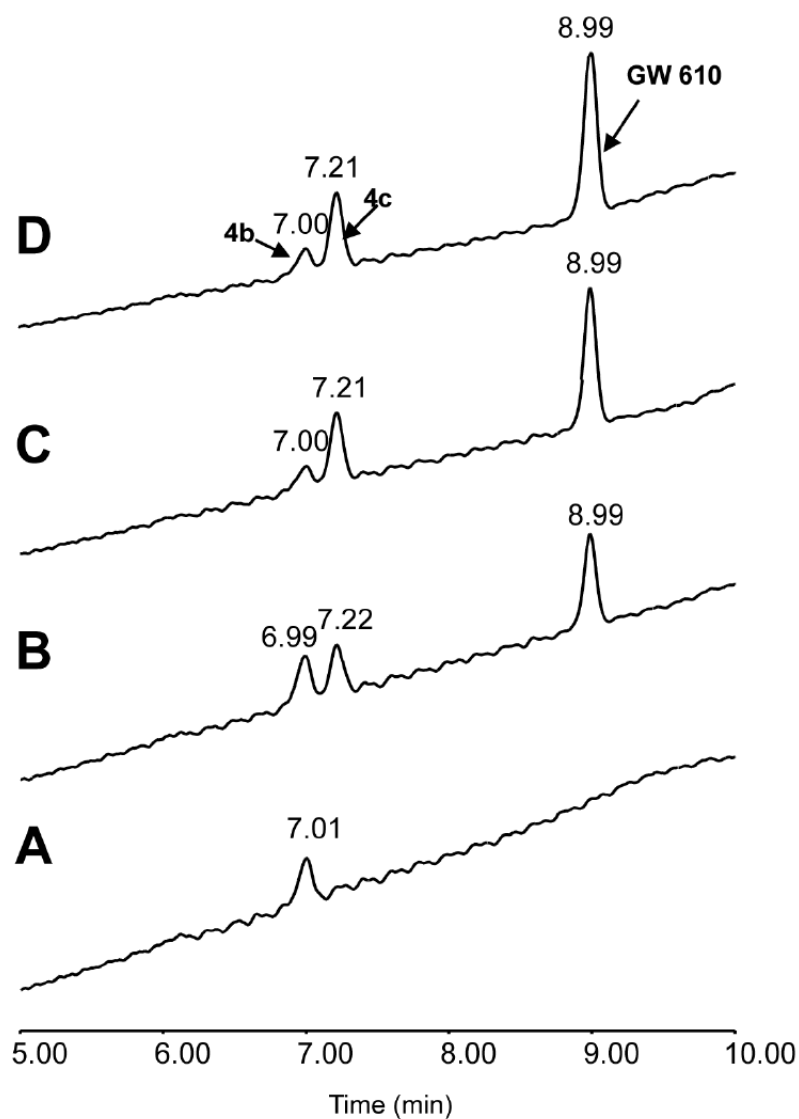

(A) **4b** (1  $\mu$ M).

(B) GW 610 (4  $\mu$ M) incubated with P450 2W1 for 10 min, then **4b** (1  $\mu$ M) was added.

(C) GW 610 (8  $\mu$ M) incubated with P450 2W1 for 10 min, then **4b** (1  $\mu$ M) was added.

(D) GW 610 (12  $\mu$ M) incubated with P450 2W1 for 10 min, then **4b** (1  $\mu$ M) was added.

\***4b** ( $t_R$  7.01 min), **4c** ( $t_R$  7.22 min), GW 610 ( $t_R$  8.99 min)

**Figure S7.** HPLC chromatograms of incubations of 5F 203 with P450s 2W1 and 1A1

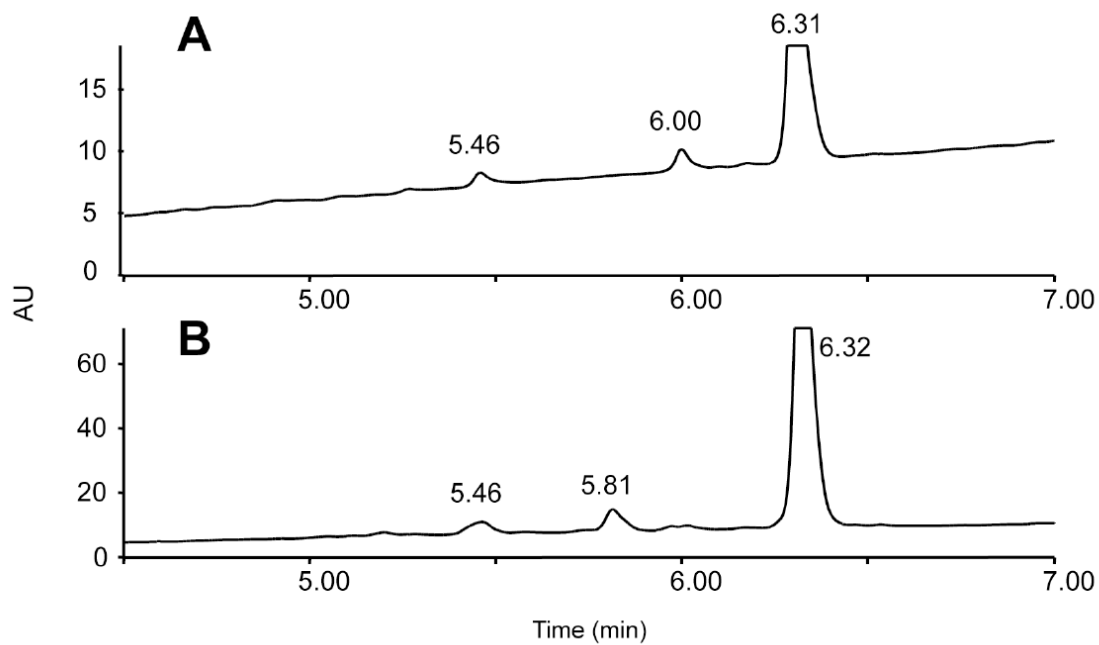

(A) Incubation of 5F 203 with P450 2W1, **8a** ( $t_R$  5.46 min), **10** ( $t_R$  6.00 min), 5F 203 ( $t_R$  6.31 min). (B) Incubation of 5F 203 with P450 1A1, **8a** ( $t_R$  5.46 min), **8b** ( $t_R$  5.81 min), 5F 203 ( $t_R$  6.32 min).



**Figure S8.** HPLC chromatograms and UV spectra of synthetic **10**, **11**, and **9**

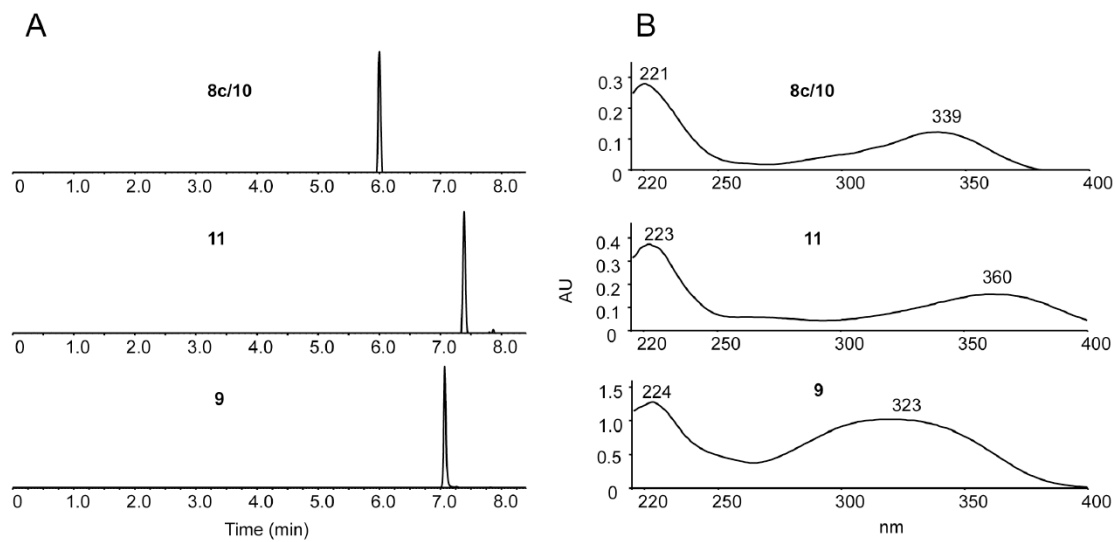

(A) HPLC chromatograms of synthetic **10**, **11**, and **9**

(B) UV spectra of synthetic **10**, **11**, and **9**

**Figure S9.** LC-MS chromatograms and spectra of **4c** and **4c'**

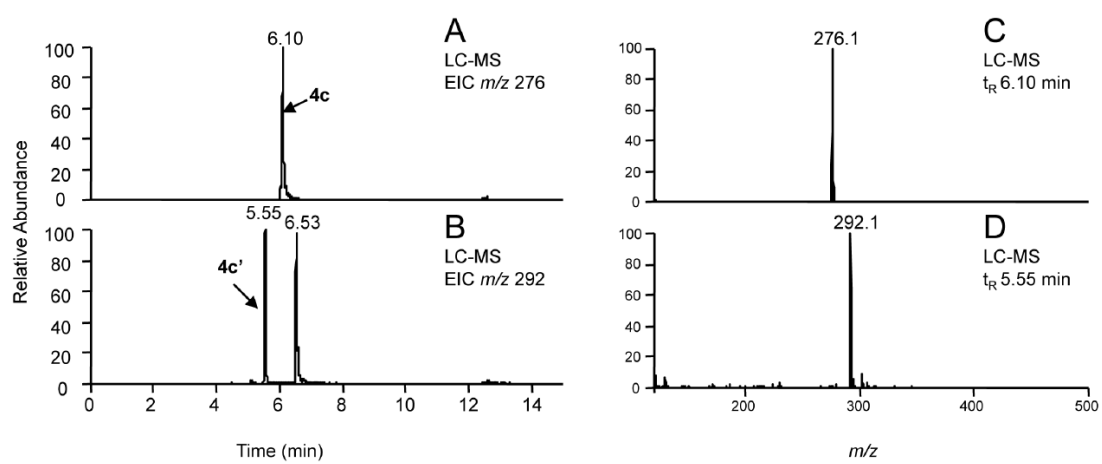

**Figure S10.** LC-MS chromatograms of 5F 203 oxidation products formed by P450s 2W1 and 1A1

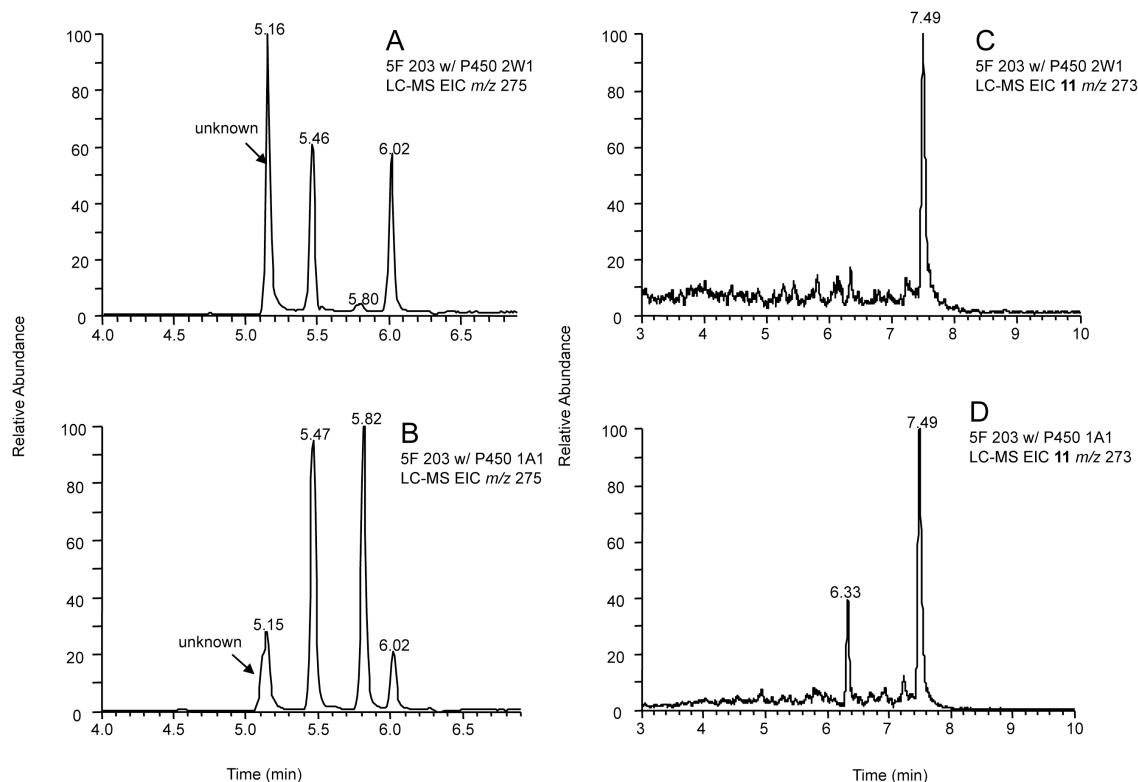

(A) Extracted ion chromatogram of  $m/z$  275 (from incubation of 5F 230 with P450 2W1, **8a**,  $t_R$  5.46 min, **8b**,  $t_R$  5.80 min, **10**,  $t_R$  6.02 min). (B) Extracted ion chromatogram of  $m/z$  275, (from incubation of 5F 230 with P450 1A1, **8a**,  $t_R$  5.47 min, **8b**,  $t_R$  5.82 min, **10**,  $t_R$  6.02 min). (C) Extracted ion chromatogram of  $m/z$  273 (from incubation of 5F 230 with P450 2W1, **11**,  $t_R$  7.49 min). (D) Extracted ion chromatogram of  $m/z$  273 (from incubation of 5F 230 with P450 1A1, **11**,  $t_R$  7.49 min).

**Figure S11.** LC-MS/MS and LC-MS<sup>3</sup> chromatograms and CID spectra showing the presence of a dGuo adduct with derived from synthetic **10**.

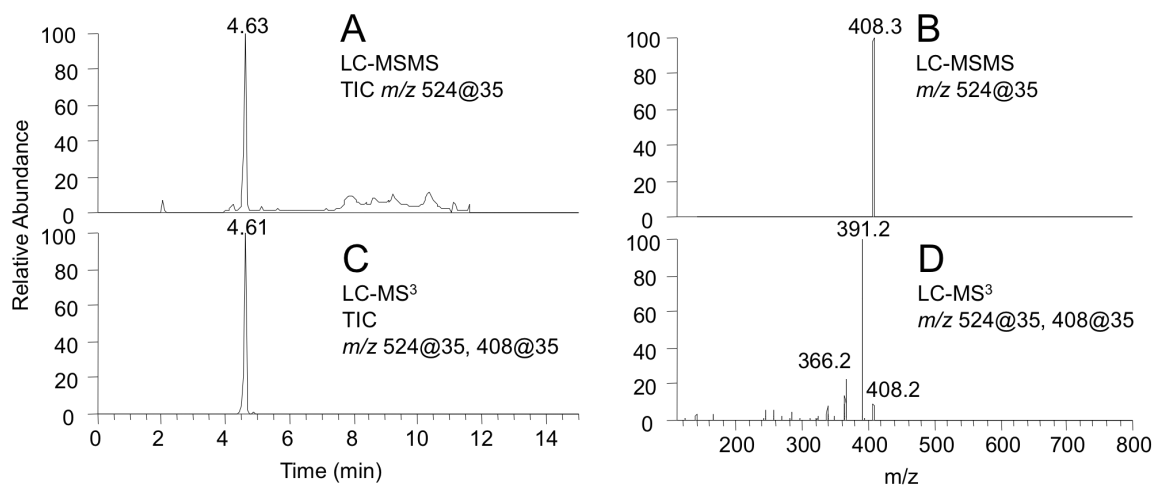

(A) Total ion chromatogram of  $m/z$  524 product ion. (B) LC-MS/MS spectrum of the peak at  $t_R$  4.63 min. (C) Total ion chromatogram of CID of the  $m/z$  408 product ion. (D) LC-MS<sup>3</sup> spectrum of the peak at  $t_R$  4.61 min.
